# Supplementary material for: Assessing Disparity Using Measures of Racial and Educational Isolation
Source: MDPI journal article supplement (doi:10.3390/ijerph18179384), 2021-09-06
Supplement: s1 [file s1]

## SUPPLEMENTAL MATERIAL

### Assessing disparity using measures of racial and educational isolation

**Mercedes A. Bravo**<sup>1,2</sup>, **Man Chong Leong**<sup>2,3</sup>, **Alan E. Gelfand**<sup>4</sup> and **Marie Lynn Miranda**<sup>2,5,\*</sup>

<sup>1</sup> Global Health Institute, Duke University, Durham, NC, USA

<sup>2</sup> Children's Environmental Health Initiative, University of Notre Dame, IN, USA

<sup>3</sup> Department of Biostatistics, University of Florida, Gainesville, FL, USA

<sup>4</sup> Department of Statistical Science, Duke University, Durham, NC, USA

<sup>5</sup> Department of Applied and Computational Mathematics and Statistics, University of Notre Dame, IN, USA

\* Correspondence: [mlm@nd.edu](mailto:mlm@nd.edu)

**SM Table S1. Urbanicity classification based on Rural-Urban Commuting Area (RUCA) codes**

| Classification | Primary codes                                                                                   | Secondary codes                              |
|----------------|-------------------------------------------------------------------------------------------------|----------------------------------------------|
| Urban          | 1.0 Metropolitan area core: primary flow within an urbanized area (UA)                          | 1.1 Secondary flow 30% to 50% to a larger UA |
|                |                                                                                                 | 2.1 Secondary flow 30% to 50% to a larger UA |
|                | 2.0 Metropolitan area high commuting: primary flow 30% or more to a UA                          | 4.1 Secondary flow 30% to 50% to a UA        |
|                |                                                                                                 | 5.1 Secondary flow 30% to 50% to a UA        |
|                | 3.0 Metropolitan area low commuting: primary flow 10% to 30% to a UA                            | 7.1 Secondary flow 30% to 50% to a UA        |
|                |                                                                                                 | 8.1 Secondary flow 30% to 50% to a UA        |
|                |                                                                                                 | 10.1 Secondary flow 30% to 50% to a UA       |
| Suburban       | 4.0 Micropolitan area core: primary flow within an urban cluster of 10,000 to 49,999 (large UC) |                                              |
|                | 5.0 Micropolitan high commuting: primary flow 30% or more to a large UC                         |                                              |
|                | 6.0 Micropolitan low commuting: primary flow 10% to 30% to a large UC                           |                                              |

---

|       |                                       |                                              |
|-------|---------------------------------------|----------------------------------------------|
| Rural | 7.0 Small town core: primary flow     | 7.2 Secondary flow 30% to 50% to a UA        |
|       | within an urban cluster of 2,500 to   |                                              |
|       | 9,999 (small UC)                      | 8.2 Secondary flow 30% to 50% to a large UC  |
|       | 8.0 Small town high commuting:        | 10.2 Secondary flow 30% to 50% to a large UC |
|       | primary flow 30% or more to a small   | 10.3 Secondary flow 30% to 50% to a small UC |
|       | UC                                    |                                              |
|       | 9.0 Small town low commuting:         |                                              |
|       | primary flow 10% to 30% to a small UC |                                              |
|       | 10.0 Rural areas: primary flow to a   |                                              |
|       | tract outside a UA or UC              |                                              |

---

| <b>SM Table S2.</b> Sensitivity Analysis of $R_i$ for different $w_{ii}$ .                                                                     |                                        |                                         |                        |
|------------------------------------------------------------------------------------------------------------------------------------------------|----------------------------------------|-----------------------------------------|------------------------|
| $w_{ii}$ weight                                                                                                                                | $w_{ij}$ weight – first order neighbor | $w_{ij}$ weight – second order neighbor | Mean (Median) of $R_i$ |
| 1.0                                                                                                                                            | 1.0                                    | 0.5                                     | 0.701 (0.761)          |
| <b>1.5</b>                                                                                                                                     | <b>1.0</b>                             | <b>0.5</b>                              | <b>0.705 (0.793)</b>   |
| 3.0                                                                                                                                            | 1.0                                    | 0.5                                     | 0.862 (0.963)          |
| 5.0                                                                                                                                            | 1.0                                    | 0.5                                     | 0.951 (0.994)          |
| 10.0                                                                                                                                           | 1.0                                    | 0.5                                     | 0.991 (0.999)          |
| 50.0                                                                                                                                           | 1.0                                    | 0.5                                     | 0.998 (1)              |
| 100.0                                                                                                                                          | 1.0                                    | 0.5                                     | 0.999 (1)              |
| The row of values highlighted in bold correspond to the weighting scheme presented in the main analysis ( $w_{ii} = 1.5$ for the index tract). |                                        |                                         |                        |

| <b>SM Table S3.</b> Sensitivity Analysis of $R_i$ for different $w_{ij}$ of first order neighbors.                                                   |                                        |                                         |                        |
|------------------------------------------------------------------------------------------------------------------------------------------------------|----------------------------------------|-----------------------------------------|------------------------|
| $w_{ii}$ weight                                                                                                                                      | $w_{ij}$ weight – first order neighbor | $w_{ij}$ weight – second order neighbor | Mean (Median) of $R_i$ |
| 1.5                                                                                                                                                  | 0.5                                    | 0.5                                     | 0.845 (0.908)          |
| 1.5                                                                                                                                                  | 0.75                                   | 0.5                                     | 0.786 (0.860)          |
| <b>1.5</b>                                                                                                                                           | <b>1.0</b>                             | <b>0.5</b>                              | 0.705 (0.793)          |
| 1.5                                                                                                                                                  | 1.25                                   | 0.5                                     | 0.683 (0.773)          |
| 1.5                                                                                                                                                  | 1.50                                   | 0.5                                     | 0.722 (0.805)          |
| The row of values highlighted in bold correspond to the weighting scheme presented in the main analysis ( $w_{ij} = 1.0$ for first order neighbors). |                                        |                                         |                        |

| <b>SM Table S4.</b> Sensitivity Analysis of $R_i$ for different $w_{ij}$ of second order neighbors.                                                   |                                        |                                         |                        |
|-------------------------------------------------------------------------------------------------------------------------------------------------------|----------------------------------------|-----------------------------------------|------------------------|
| $w_{ii}$ weight                                                                                                                                       | $w_{ij}$ weight – first order neighbor | $w_{ij}$ weight – second order neighbor | Mean (Median) of $R_i$ |
| 1.5                                                                                                                                                   | 1.0                                    | 0.01                                    | 0.622 (0.716)          |
| 1.5                                                                                                                                                   | 1.0                                    | 0.1                                     | 0.756 (0.833)          |
| 1.5                                                                                                                                                   | 1.0                                    | 0.25                                    | 0.785 (0.759)          |
| <b>1.5</b>                                                                                                                                            | <b>1.0</b>                             | <b>0.5</b>                              | <b>0.705 (0.793)</b>   |
| 1.5                                                                                                                                                   | 1.0                                    | 1.0                                     | 0.271 (0.288)          |
| The row of values highlighted in bold correspond to the weighting scheme presented in the main analysis ( $w_{ij} = 0.5$ for second order neighbors). |                                        |                                         |                        |

| <b>SM Table S5. Summary statistics of initial and analysis dataset of Michigan births<sup>a</sup></b>                                                                                                                                                                                                                |                                  |                                  |
|----------------------------------------------------------------------------------------------------------------------------------------------------------------------------------------------------------------------------------------------------------------------------------------------------------------------|----------------------------------|----------------------------------|
|                                                                                                                                                                                                                                                                                                                      | All births data<br>(n=1,608,537) | Analysis data set<br>(n=807,991) |
| Born between 2005-2012                                                                                                                                                                                                                                                                                               | 954,455 (59.3)                   | 807,991 (100.0)                  |
| Geocoded                                                                                                                                                                                                                                                                                                             | 1,583,214 (98.4)                 | 807,991 (100.0)                  |
| <b>Neighborhood characteristics</b>                                                                                                                                                                                                                                                                                  |                                  |                                  |
| RI of non-Hispanic Blacks, mean (SD)                                                                                                                                                                                                                                                                                 | 0.17 (0.26)                      | 0.17 (0.26)                      |
| EI of non-college educated individuals, mean (SD)                                                                                                                                                                                                                                                                    | 0.76 (0.14)                      | 0.76 (0.13)                      |
| <b>Infant characteristics</b>                                                                                                                                                                                                                                                                                        |                                  |                                  |
| Gestational age, weeks, mean (SD)                                                                                                                                                                                                                                                                                    | 38.6 (2.3)                       | 38.5 (2.2)                       |
| Preterm birth                                                                                                                                                                                                                                                                                                        | 164,995 (10.3)                   | 83,304 (10.3)                    |
| Male                                                                                                                                                                                                                                                                                                                 | 824,368 (51.2)                   | 413,727 (51.2)                   |
| <b>Maternal characteristics<sup>b</sup></b>                                                                                                                                                                                                                                                                          |                                  |                                  |
| <b>Race/ethnicity</b>                                                                                                                                                                                                                                                                                                |                                  |                                  |
| Non-Hispanic Black                                                                                                                                                                                                                                                                                                   | 286,722 (17.8)                   | 166,720 (20.6)                   |
| Non-Hispanic White                                                                                                                                                                                                                                                                                                   | 1,121,014 (69.7)                 | 641,271 (79.4)                   |
| Hispanic                                                                                                                                                                                                                                                                                                             | 103,447 (6.43)                   | 0 (0)                            |
| Non-Hispanic Asian/Pacific Islander                                                                                                                                                                                                                                                                                  | 52,301 (3.25)                    | 0 (0)                            |
| Non-Hispanic other                                                                                                                                                                                                                                                                                                   | 23,633 (1.47)                    | 0 (0)                            |
| Reported smoking during pregnancy (1=smoker)                                                                                                                                                                                                                                                                         | 271,111 (16.9)                   | 155,649 (19.3)                   |
| <b>Age at birth (years)</b>                                                                                                                                                                                                                                                                                          |                                  |                                  |
| 15-19                                                                                                                                                                                                                                                                                                                | 153,118 (9.52)                   | 73,976 (9.16)                    |
| 20-24                                                                                                                                                                                                                                                                                                                | 391,230 (24.3)                   | 197,730 (24.5)                   |
| 25-29                                                                                                                                                                                                                                                                                                                | 463,868 (28.8)                   | 239,448 (29.6)                   |
| 30-34                                                                                                                                                                                                                                                                                                                | 388,431 (24.1)                   | 192,654 (23.8)                   |
| 35-39                                                                                                                                                                                                                                                                                                                | 172,318 (10.7)                   | 85,858 (10.6)                    |
| 40-44                                                                                                                                                                                                                                                                                                                | 35,126 (2.18)                    | 18,325 (2.27)                    |
| <b>Educational attainment</b>                                                                                                                                                                                                                                                                                        |                                  |                                  |
| Less than high school                                                                                                                                                                                                                                                                                                | 263,321 (16.4)                   | 112,499 (13.9)                   |
| High school diploma                                                                                                                                                                                                                                                                                                  | 893,630 (55.6)                   | 471,467 (58.3)                   |
| College diploma or higher                                                                                                                                                                                                                                                                                            | 427,007 (26.5)                   | 224,025 (27.8)                   |
| Unmarried at time of birth (1=unmarried)                                                                                                                                                                                                                                                                             | 613,859 (38.2)                   | 326,837 (40.5)                   |
| <sup>a</sup> The cell count and percent are presented except in the case of RI, EI, and gestation length, for which the mean and standard deviation are given as indicated next to the variable name. <sup>b</sup> Maternal variables are based on reported maternal characteristics at time of the neonate's birth. |                                  |                                  |

| <b>SM Table S6. Associations between gestational age in weeks and racial isolation and educational isolation</b> |                           |                           |
|------------------------------------------------------------------------------------------------------------------|---------------------------|---------------------------|
|                                                                                                                  | <b>non-Hispanic Black</b> | <b>non-Hispanic White</b> |
| <b>Neighborhood characteristics</b>                                                                              |                           |                           |
| RI of non-Hispanic Blacks                                                                                        | -0.069 (-0.10, -0.034)    | -0.10 (-0.14, -0.065)     |
| EI of non-college educated individuals                                                                           | -0.066 (-0.12, -0.047)    | -0.067 (-0.087, -0.018)   |
| <b>Individual characteristics</b>                                                                                |                           |                           |
| Male infant                                                                                                      | -0.007 (-0.033, 0.020)    | -0.076 (-0.086, -0.066)   |
| Reported smoking during pregnancy (1=smoker)                                                                     | -0.14 (-0.18, -0.10)      | -0.10 (-0.12, -0.087)     |
| <b>Age at birth (years)</b>                                                                                      |                           |                           |
| 15-19                                                                                                            | 0.32 (0.27, 0.36)         | 0.15 (0.13, 0.18)         |
| 20-24                                                                                                            | 0.19 (0.15, 0.22)         | 0.10 (0.087, 0.12)        |
| 25-29                                                                                                            | Reference                 | Reference                 |
| 30-34                                                                                                            | -0.18 (-0.23, -0.14)      | -0.13 (-0.15, -0.12)      |
| 35-39                                                                                                            | -0.44 (-0.50, -0.39)      | -0.28 (-0.30, 0.26)       |
| 40-44                                                                                                            | -0.46 (-0.56, -0.35)      | -0.38 (-0.42, -0.35)      |
| <b>Educational attainment</b>                                                                                    |                           |                           |
| Less than high school                                                                                            | -0.040 (-0.074, -0.0071)  | -0.079 (-0.097, -0.061)   |
| High school diploma                                                                                              | Reference                 | Reference                 |
| College diploma or higher                                                                                        | 0.11 (0.055, 0.16)        | 0.081 (0.069, 0.094)      |
| Unmarried at time of birth (1=unmarried)                                                                         | -0.12 (-0.15, -0.078)     | -0.030 (-0.044, -0.017)   |
|                                                                                                                  |                           |                           |



| SM Table S7. Associations between preterm birth and racial isolation and educational isolation |                                        |                    |
|------------------------------------------------------------------------------------------------|----------------------------------------|--------------------|
|                                                                                                | Odds ratios (95% confidence intervals) |                    |
|                                                                                                | non-Hispanic Black                     | non-Hispanic White |
| <b>Neighborhood characteristics</b>                                                            |                                        |                    |
| RI of non-Hispanic Blacks                                                                      | 1.11 (1.07, 1.15)                      | 1.16 (1.10, 1.22)  |
| EI of non-college educated individuals                                                         | 1.07 (1.02, 1.12)                      | 1.03 (1.00, 1.05)  |
| <b>Individual characteristics</b>                                                              |                                        |                    |
| Male infant                                                                                    | 1.02 (0.99, 1.05)                      | 1.11 (1.09, 1.13)  |
| Reported smoking during pregnancy                                                              | 1.16 (1.12, 1.20)                      | 1.12 (1.09, 1.14)  |
| Age at birth (years)                                                                           |                                        |                    |
| 15-19                                                                                          | 0.79 (0.75, 0.82)                      | 0.92 (0.88, 0.96)  |
| 20-24                                                                                          | 0.85 (0.82, 0.89)                      | 0.92 (0.90, 0.95)  |
| 25-29                                                                                          | Reference                              | Reference          |
| 30-34                                                                                          | 1.17 (1.12, 1.23)                      | 1.14 (1.12, 1.17)  |
| 35-39                                                                                          | 1.47 (1.39, 1.54)                      | 1.35 (1.31, 1.39)  |
| 40-44                                                                                          | 1.59 (1.44, 1.75)                      | 1.47 (1.39, 1.54)  |
| Educational attainment                                                                         |                                        |                    |
| Less than high school                                                                          | 1.09 (1.05, 1.12)                      | 1.11 (1.08, 1.15)  |
| High school diploma                                                                            | Reference                              | Reference          |
| College diploma or higher                                                                      | 0.91 (0.87, 0.96)                      | 0.94 (0.93, 0.97)  |
| Unmarried at time of birth (1=unmarried)                                                       | 1.18 (1.13, 1.23)                      | 1.12 (1.09, 1.14)  |
|                                                                                                |                                        |                    |
